# Supplementary material for: Pseudomonas aeruginosa Phenotypes Associated with Radiological Severity in Non-Cystic Fibrosis Bronchiectasis
Source: Research Square preprint supplement (doi:10.21203/rs.3.rs-7298910/v1), 2025-08-21
Supplement: Supplementary file 1 [file a74461bb906ad1e43a5aa84e.docx]

**Supplementary Materials**

**Phenotyping of PA isolates**

Swimming motility was determined by inoculating a single colony into a 0.3% Luria-Bertani (LB) agar and was visually scored for swimming diameter (mm) of the zone of bacterial growth after overnight incubation at 37 °C. Twitching motility was assayed by inoculating a single colony onto a 1% thin LB agar plate and measuring the diameter (mm) of the twitching zone following staining with 0.1% crystal violet (CV). Biofilm formation was measured by inoculating polystyrene 96-well plates with 180 µL of an LB medium and 20 µL of isolate suspension (initial concentration of 107 CFU/mL). After static incubation overnight at 37 °C, the adherent biofilm biomass was stained with 0.1% CV, resolubilized with 95% ethanol, and measured at optical density (OD) 595 nm. The colony sizes of the bacterial isolates were qualitatively scored as normal, large, small, or pinpoint relative to that of the control (PAO1) after incubation on LB agar plates for 24 h. Colonies growing for 48 h on LB agar plates were visually inspected for mucoidy and the presence of a metallic, iridescent surface sheen and/or colony lysis, which were scored as present or absent. Simultaneously, the production of pyoverdine, pyocyanin, pyorubrin, and pyomelanin, or the absence of pigments, was visually scored and interpreted qualitatively from the colony color and surrounding agar. Yellow, blue-green, red, and brown colors were considered to indicate these pigments. The Congo red binding assay was used to assess EPS-mediated bacterial aggregation in liquid culture. Overnight PA cultures (100 µL) were diluted in 4 mL of Vogel-Bonner minimal medium (VBMM) containing 40 µg/mL Congo red (Sigma catalog number C6767) and incubated for 18 h at 37 °C with shaking at 190 × *g*. The bacterial cells were centrifuged, and the absorbance of the supernatant was measured at 490 nm (OD490nm). Congo red binding was calculated as: (OD490nm [VBMM + Congo red control] – OD490nm [sample]). Similarly, colonies grown on Congo red plates were visually and qualitatively scored for rough, wrinkly, or smooth phenotypes after incubation for 4 days at 30 °C. Auxotrophy was identified by poor or absent growth on the defined agar media (1×M63 salts, 20 mM sodium succinate, 1 mM magnesium chloride, 100 µM ferrous ammonium sulfate, and 1.5% agar). Bacteria were inoculated onto these plates and incubated for 4 days at 37 °C, and growth was scored as present or absent. Bacteria were inoculated on the LB agar containing 100 g/L skim milk and incubated for 20 h at 37 °C. The diameter of the milk turbidity clearing surrounding each colony was visually scored for intact and deficient protease production.

**Tables**

**Table S1**. Other clinical data used in regression models

| Category | Description |
| --- | --- |
| Smoking, n (%) | 11 (27.5) |
| White blood cell ,109/L | 8.2（5.74-10.40） |
| Neutrophil, 109/L | 5.7（3.8-9.8） |
| C-reactive protein, mg/L | 34.9（12.5-49.8） |
| Percent of neutrophil, % | 73.2（65.0-83.7） |
| Comorbidities, n (%) |  |
| Hypertension | 15 (37.5) |
| Diabetes | 6 (15.0) |
| Heart disease | 17 (42.5) |
| Chronic kidney disease | 5 (12.5) |
| Cerebrovascular disease | 11 (27.5) |
| Time since diagnosis of bronchiectasis, year | 10.0 (3.0-20.0) |

**Table S2**. β Coeffcients of HRCT scores by colony size

| Model | Small(n=10) | | | Normal(n=9) | | | Large(n=4) | | |
| --- | --- | --- | --- | --- | --- | --- | --- | --- | --- |
| β(95%CI) | *P* | VIF | β(95%CI) | *P* | VIF | β(95%CI) | *P* | VIF |
| BRICS |  |  |  |  |  |  |  |  |  |
| Model 1 | -0.96(-1.73,-0.19) | 0.016 | 1.19 | -0.39(-1.19,0.41) | 0.326 | 1.19 | -2.56(-3.64,-1.48) | 0.001 | 1.11 |
| Model 2 | -0.86(-1.75,0.03) | 0.057 | 1.59 | -0.37(-1.25,0.51) | 0.402 | 1.45 | -2.69(-3.85,-1.54) | 0.001 | 1.30 |
| Model 3 | -0.98(-1.92,-0.05) | 0.040 | 1.78 | -0.66(-1.66,0.34) | 0.188 | 1.90 | -2.26(-3.52,-1.00) | 0.001 | 1.55 |
| Model 4 | -0.87(-1.91,0.17) | 0.096 | 1.96 | -0.42(-1.55,0.72) | 0.458 | 2.19 | -2.20(-3.59,-0.81) | 0.003 | 1.69 |
| Model 5 | -0.94(-2.09,0.21) | 0.103 | 2.07 | -0.41(-1.83,1.02) | 0.556 | 2.97 | -2.56(-4.45,-0.67) | 0.011 | 2.70 |
| Bhalla |  |  |  |  |  |  |  |  |  |
| Model 1 | -2.54(-5.34,0.26) | 0.074 | 1.19 | -0.83(-3.72,2.06) | 0.564 | 1.19 | -3.44(-7.34,0.46) | 0.082 | 1.11 |

VIF, variance inflation factor; 95%CI,95%Confidence interval;

Reference=Pinpoint

Model 1:Unadjusted

Model 2: Model 1 +Demographic characteristics (BMI, Age, Gender, Smoking)

Model 3: Model 2+ Clinical characteristics (mMRC, Hospitalization frequency in the past two years, Exacerbation frequency in the past year, Etiology, complication, Duration of disease)

Model 4: Model 3+ Laboratory examination (White blood cell, Neutrophil, C-reactive protein, percent of neutrophil)

Model 5: Model 5+ Other bacterial phenotypes(Swimming, Muciody, Twitching)

**Figure Legends**

**FigureS1** . Linear regression forest map of the relationship between PA phenotype and the Bhalla score and BRICS. A. PA phenotype and the Bhalla score; B. PA phenotype and BRICS.

VIF, variance inflation factor; 95%CI, 95%Confidence interval.

Model 1: unadjusted;

Model 2*: Model 1 +Demographic characteristics (BM, Age, Smoking)

Model 3*: Model 2*+ Clinical characteristics (mMRC, Hospitalization frequency in the past two years, Exacerbation frequency in the past year, Etiology, complication, Duration of disease) ;

Model 4*: Model 1+Clinical characteristics (mMRC, Hospitalization frequency in the past two years, Exacerbation frequency in the past year, Etiology, complication, Duration of disease) ;

Model 5*: Model 1+Laboratory examination (White blood cell, Neutrophil, C-reactive protein, percent of neutrophil) .
